# Supplementary material
Source: PubMed Central journal article supplement (PMC4412814)
Supplement: NIHMS677232-supplement-Supp_Material.pdf [file NIHMS677232-supplement-Supp_Material.pdf]

**Evolutionary dynamics of Rh2 opsins in birds demonstrate an episode of accelerated evolution in the New World warblers (*Setophaga*)**

Natasha I. Bloch, Trevor D. Price and Belinda S.W. Chang

**TABLE OF CONTENTS**

|                                                                                                                                |           |
|--------------------------------------------------------------------------------------------------------------------------------|-----------|
| <b>1. <u>SUPPLEMENTARY FIGURES</u></b>                                                                                         | <b>2</b>  |
| FIGURE S1: AMINO ACID SEQUENCE ALIGNMENT OF RH2 OPSINS OF NEW WORLD AND OLD WORLD WARBLERS.                                    | 2         |
| FIGURE S2: RH2 VARIABLE SITE SUMMARY BASED ON CONSENSUS OF ALL CLADES.                                                         | 4         |
| FIGURE S3: CLADOGRAM OF THE NEW WORLD WARBLER SPECIES TRACING THE ACCUMULATION OF RH2 SUBSTITUTIONS ACROSS NEW WORLD WARBLERS. | 5         |
| FIGURE S4: VARIATION IN RH1 NON-SYNONYMOUS RATES OF EVOLUTION (dN ) ACROSS PASSERINES.                                         | 6         |
| <b>2. <u>SUPPLEMENTARY TABLES</u></b>                                                                                          | <b>7</b>  |
| TABLE S1: SPECIES WITH AVAILABLE RH2 AND RH1 SEQUENCES USED IN EVOLUTIONARY ANALYSES                                           | 7         |
| TABLE S2: PRIMERS USED TO AMPLIFY FULL OPSIN CODING SEQUENCES                                                                  | 8         |
| TABLE S3: SEQUENCES USED IN THE CONSTRUCTION OF THE TIME-CALIBRATED PHYLOGENY OF SPECIES USED IN THIS STUDY.                   | 9         |
| TABLE S4: TIME CALIBRATIONS USED FOR DATE ESTIMATES IN THE PHYLOGENY CONSTRUCTION                                              | 11        |
| TABLE S5: PARAMETERS USED TO CHOOSE THE MOST APPROPRIATE MODELS FOR EMPIRICAL BAYES ANCESTRAL RECONSTRUCTIONS                  | 12        |
| TABLE S6: PARAMETER ESTIMATES FOR PASSERINE RH2 CLADE MODEL D                                                                  | 13        |
| TABLE S7: PARAMETER ESTIMATES FOR PASSERINES RH1 CLADE MODELS (CMC)                                                            | 14        |
| TABLE S8: SYNONYMOUS AND NON-SYNONYMOUS RATES OF EVOLUTION ESTIMATED FOR RH2 AND RH1                                           | 15        |
| <b>3. <u>SUPPLEMENTARY REFERENCES</u></b>                                                                                      | <b>16</b> |



Numbering corresponds to Bovine rhodopsin (GenBank M21606). Grey boxes indicate the seven transmembrane helices (H-I through H-VII) (Palczewski et al. 2000). The variable sites across warbler clades are highlighted indicating their position relative to the transmembrane domains and colored according to amino acid identity. Species names are abbreviated as the first letter of the genus and the three first letters of the species. Full names can be found in Figs. 1 & 2.

**Figure S2: Rh2 variable site summary based on consensus of all clades.**

|                                       |                                     |
|---------------------------------------|-------------------------------------|
|                                       | 1111111111122222222222333333*       |
|                                       | 3558003555567901112334488033344     |
|                                       | 79265489014859882787130849423607    |
| New World warblers                    | Scae .....E.....                    |
|                                       | Scas .....S.....                    |
|                                       | Sfus V...F.....I.....G.             |
|                                       | Smag .....S.....                    |
|                                       | Spal .....S.....                    |
|                                       | Spen V...F.....S.....               |
|                                       | Spet .....S.....                    |
|                                       | Sstr .....S.....                    |
|                                       | Gtri .....S.....                    |
|                                       | Gphi .....S.....                    |
|                                       | Mvar .....S.....                    |
|                                       | Saur .....S.....                    |
|                                       | Srut .....S.....                    |
|                                       | Oruf .....E.....                    |
| Cpus .....S.....                      |                                     |
| Old World warblers                    | Zalb .....E.....                    |
|                                       | Pcya .....S.....                    |
|                                       | Scan ....V.....S...P.....E....      |
|                                       | Tgut .....L.....E.....              |
|                                       | Gfor .....CA.....                   |
|                                       | Falb .....S.....                    |
|                                       | Phum .....S.....                    |
|                                       | Pmac .....S.....                    |
|                                       | Pocc .....S.....                    |
|                                       | Pchl .....S.....                    |
| Ppul .....S.....                      |                                     |
| Preg .....S.....                      |                                     |
| Swis .....S.....                      |                                     |
| Bowerbirds                            | Chyp .....IV.....I.....E....        |
|                                       | Rreg .....L.....S.....              |
|                                       | Pshu .....A.....                    |
|                                       | Aino ---.MV...V...I.....----        |
|                                       | Amac ---.V...V...I.....----         |
|                                       | Cnuc ---.V...V...I.....----         |
|                                       | Pvio ---.V...I.....----             |
|                                       | Cgut ---.V...I.....----             |
|                                       | Cmac ---.V...I.....----             |
|                                       | Apap ---.V...I.....----             |
|                                       | Acra ---.V...VV...I.....----        |
|                                       | Asub ---.V...V...I.....----         |
|                                       | Pnew ---.V...V...I.....----         |
|                                       | Mund VLLF.VS...FMY...VI...RSSV..A.I |
| Ggal ..LLF.VV.T.FMY...VI.....V...     |                                     |
| CONS ILFFCVIIASMAIIFFFVIVRASKTAIDTTSV |                                     |

Numbers correspond to amino acid positions standardized by the bovine Rhodopsin (GenBank M21606). Here complete amino acid sequences were used. The last line (CONS) corresponds to the consensus sequence. Dots indicate the identity of the amino acids with the consensus sequences at each site, thus species that only have dots match the consensus amino acid sequence at all sites. Dashes (-) indicate positions for which we do not have sequence information in bowerbirds (Sites missing in the limited sequence dataset because Bowerbird sequences from Coyle et al. (2012) cover amino acids residues 55 to 314). \*Indicates the site that was inferred to be evolving under positive selection in models using the limited sequence dataset. Species names are abbreviated as the first letter of the genus and the three first letters of the species see Fig. 1 & 2 for full species names). Abbreviations of bowerbird species correspond to *Ailuroedus crassirostris*, *Archboldia papuensis*, *Amblyornis macgregoriae*, *Amblyornis subalaris*, *Amblyornis inornatus*, *Chlamydera nuchalis*, *Chlamydera maculata*, *Chlamydera guttata*, *Prionodura newtoniana*, *Ptilonorhynchus violaceus*.

**Figure S3: Cladogram of the New World warbler species tracing the accumulation of Rh2 substitutions across New World warblers.**

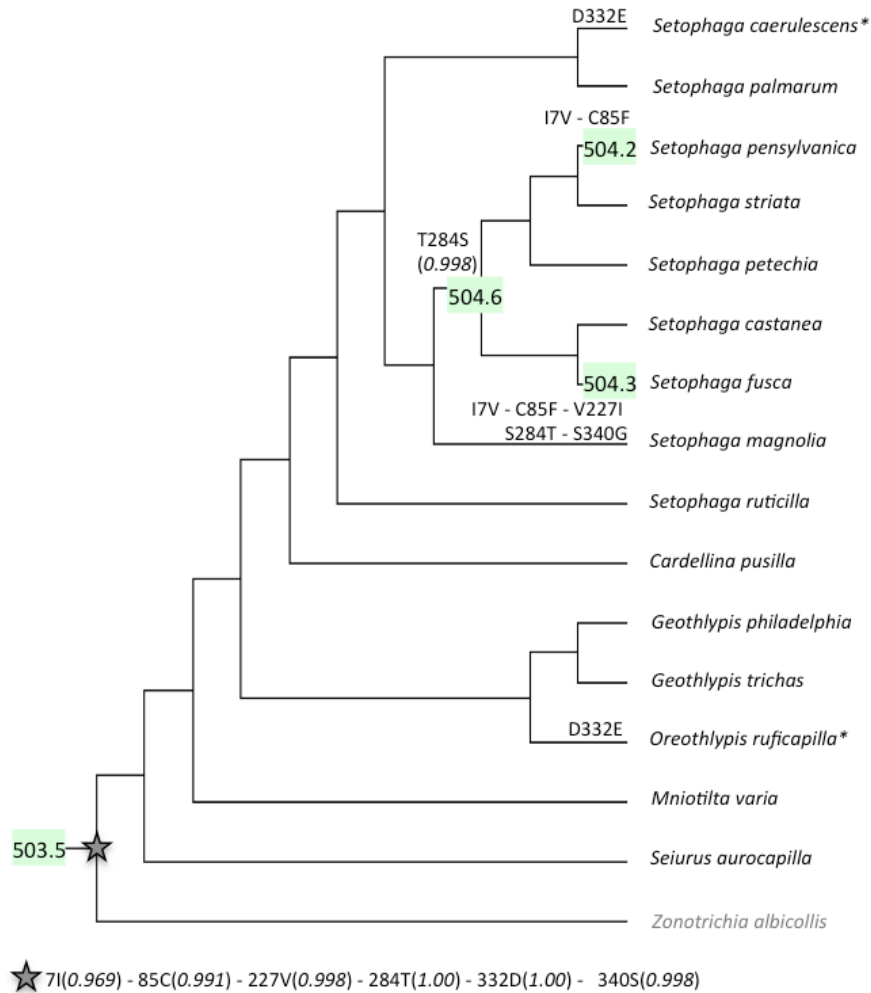

Substitutions are shown next to the branch where they occur. The phylogeny for New World warblers and *Z. albicollis* is based on Lovette et al. (2010). Posterior probabilities for variable amino acid sites at every node from Empirical Bayes ancestral reconstructions are shown in parentheses. All ancestral reconstruction models agreed on the identity of amino acids at all nodes. We show posterior probabilities for nucleotide EB models, which were the most conservative compared to codon and amino acid models. Values in green boxes indicate the  $\lambda_{\max}$  values of the RH2 pigment for the ancestor of New World warblers and each species or node where a substitution occurred. Unless otherwise indicated the RH2 of all species following a node have the same  $\lambda_{\max}$ .

**Figure S4: Variation in Rh1 non-synonymous rates of evolution ( $d_N$ ) across Passerines.**

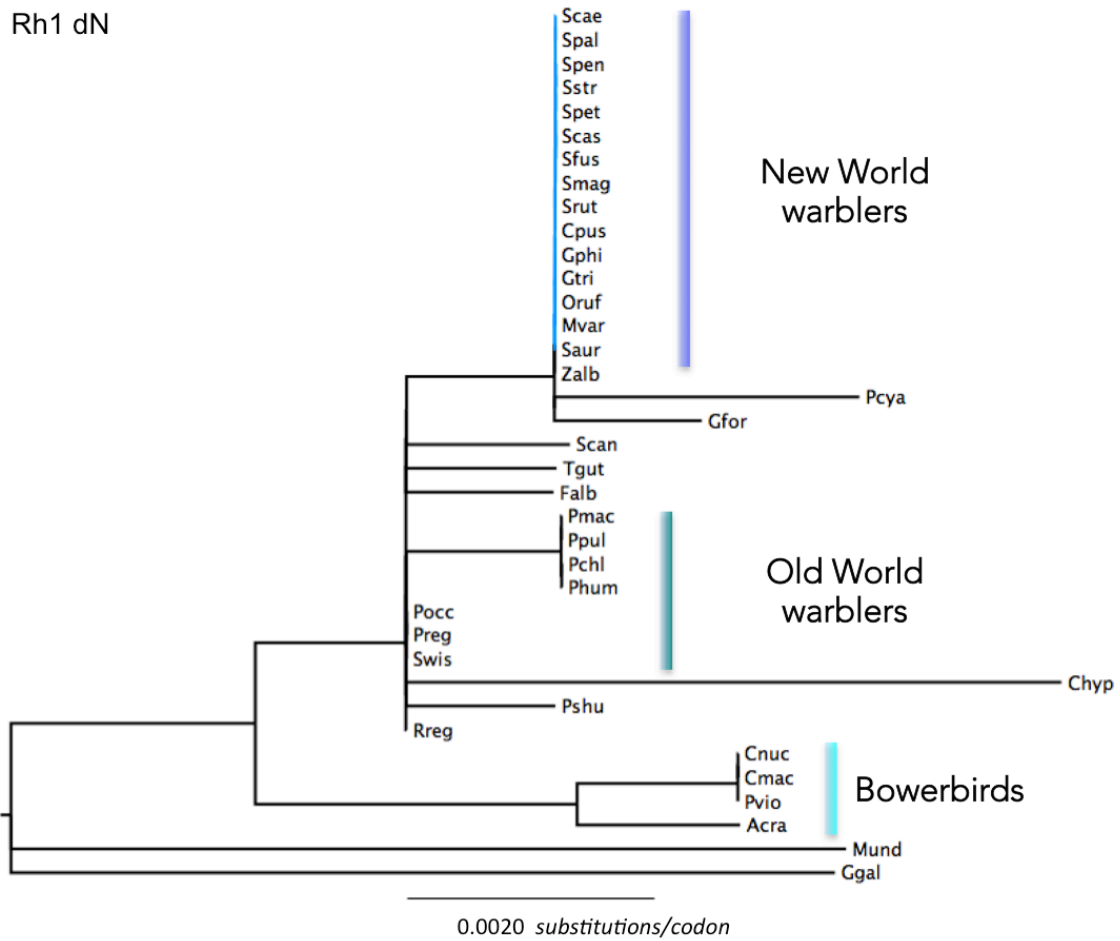

Branch lengths are scaled by  $d_N$  rates. Branch lengths were estimated using a free ratio model as implemented in PAML, that estimates independent  $d_N$  rates for each branch in the tree. Branches in blue highlight New World warblers. Scale bar indicates value of  $d_N$  as in the Rh2 trees in Fig. 4.

## 2. Supplementary tables

**Table S1: Species with available Rh2 and Rh1 sequences used in evolutionary analyses**

| Order          | Family            | Species                          | Common name             | Rh2<br>Accession # | Rh1<br>Accession # | Reference                                     |
|----------------|-------------------|----------------------------------|-------------------------|--------------------|--------------------|-----------------------------------------------|
| Passeriformes  | Estrildidae       | <i>Taeniopygia guttata</i>       | Zebrafinch              | AF222332           | AF222329           | (Yokoyama <i>et al.</i> 2000)                 |
| Passeriformes  | Thraupidae        | <i>Geospiza fortis</i>           | Medium ground-finch     | XM_005428907       | NA                 | Derived from genome by computational analysis |
| Passeriformes  | Muscicapidae      | <i>Ficedula albicollis</i>       | Collared flycatcher     | XM_005059479       | NA                 | Derived from genome by computational analysis |
| Passeriformes  | Fringillidae      | <i>Serinus canaria</i>           | Canary                  | AJ277923           | AJ277926           | (Das <i>et al.</i> 1999)                      |
| Passeriformes  | Paridae           | <i>Pseudopodoces humilis</i>     | Hume's ground-tit       | XM_005529357       | NA                 | Derived from genome by computational analysis |
| Psittaciformes | Psittacidae       | <i>Melopsittacus undulatus</i>   | Budgerigar              | AF021241           | AJ277926           | (Heath <i>et al.</i> 1997)                    |
| Galliformes    | Phasianidae       | <i>Gallus gallus</i>             | Chicken                 | NM205517           | NM_001030606       | (Okano <i>et al.</i> 1992)                    |
| Passeriformes  | Ptilonorhynchidae | <i>Ailuroedus crassirostris</i>  | Green catbird           | JQ034374           | JQ034381           | (Coyle <i>et al.</i> 2012)                    |
| Passeriformes  | Ptilonorhynchidae | <i>Archboldia papuensis</i>      | Archbold bowerbird      | JQ034403           | NA                 | (Coyle <i>et al.</i> 2012)                    |
| Passeriformes  | Ptilonorhynchidae | <i>Amblyornis macgregoriae</i>   | Macgregor bowerbird     | JQ034402           | NA                 | (Coyle <i>et al.</i> 2012)                    |
| Passeriformes  | Ptilonorhynchidae | <i>Amblyornis subalaris</i>      | Streaked bowerbird      | JQ034400           | NA                 | (Coyle <i>et al.</i> 2012)                    |
| Passeriformes  | Ptilonorhynchidae | <i>Amblyornis inornatus</i>      | Vogelkop bowerbird      | JQ034401           | NA                 | (Coyle <i>et al.</i> 2012)                    |
| Passeriformes  | Ptilonorhynchidae | <i>Chlamydera nuchalis</i>       | Great bowerbird         | JQ034395           | JQ034384           | (Coyle <i>et al.</i> 2012)                    |
| Passeriformes  | Ptilonorhynchidae | <i>Chlamydera maculata</i>       | Spotted bowerbird       | JQ034394           | JQ034385           | (Coyle <i>et al.</i> 2012)                    |
| Passeriformes  | Ptilonorhynchidae | <i>Chlamydera guttata</i>        | Western bowerbird       | JQ034393           | NA                 | (Coyle <i>et al.</i> 2012)                    |
| Passeriformes  | Ptilonorhynchidae | <i>Chlamydera cerviniventris</i> | Fawn-breasted bowerbird | JQ034396           | NA                 | (Coyle <i>et al.</i> 2012)                    |
| Passeriformes  | Ptilonorhynchidae | <i>Prionodura newtoniana</i>     | Golden bowerbird        | JQ034399           | NA                 | (Coyle <i>et al.</i> 2012)                    |
| Passeriformes  | Ptilonorhynchidae | <i>Ptilonorhynchus violaceus</i> | Satin bowerbird         | JQ034392           | JQ034383           | (Coyle <i>et al.</i> 2012)                    |

**Table S2: Primers used to amplify full opsin coding sequences**

| <b>A</b>                                                                                   |            | <b>Rh2</b>                                                     |                                                                     |
|--------------------------------------------------------------------------------------------|------------|----------------------------------------------------------------|---------------------------------------------------------------------|
|                                                                                            |            | <b>Outer</b>                                                   | <b>Nested</b>                                                       |
| <b>Initial Degenerate Primers</b>                                                          | for<br>rev | GGG ACG GAR GGS RTC AAT TTT TA<br>ACT TGG CTG GAG GAR AYR GA   | TTT ACG TGC CTA TGT CCA ACA AGA C<br>GAC CTC RGT CTT GCT CTG GGA TA |
| <b>RACE primers</b><br><i>(used in combination with universal primers (UOP &amp; NUP))</i> | 5'<br>3'   | AAA GCA GGC CAT GCA CA<br>TTC GGC TGG TCC AGG TAC              | GCT TCT TGT GCT TGA AGG TG<br>TTC GGC TGG TCC AGG TAC               |
| <b>Primers for coding sequences amplification</b>                                          | for<br>rev | CAG GGC AGC ATG AAC GGG ACG G<br>GCT CGG CAG GTC ACC CCA GTT C | ATG AAC GGG ACG GAG GGG AT<br>ACC CCA GTT CAA ACT GTC CAT GC        |

| <b>B</b>                                                                                   |            | <b>Rh1</b>                                                     |                                                                  |
|--------------------------------------------------------------------------------------------|------------|----------------------------------------------------------------|------------------------------------------------------------------|
|                                                                                            |            | <b>Outer</b>                                                   | <b>Nested</b>                                                    |
| <b>Initial Degenerate Primers</b>                                                          | for<br>rev | ATG AAC GGG ACM GAA GGC CAA<br>GAG ACC TGG CTG GTG GAR ACG GA  | GAC TTC TAY GTG CCC ATG TCC AA<br>CTC TGT CTT GCC MGC AGA YGT GT |
| <b>RACE primers</b><br><i>(used in combination with universal primers (UOP &amp; NUP))</i> | 5'<br>3'   | TGT ACA TGG TGG TTG TGA AGC C<br>TGG TTC ACT TCA TGA TCC CGC T | TTG TGC TGG ATG GTG ACG TA<br>TTC TGC TAT GGG AAC CTG GTC T      |
| <b>Primers for coding sequences amplification</b>                                          | for<br>rev | TGG GGT GAC AGT GAA GGC TGA<br>TTT CAG CCT TGT TCC CAG GGT     | CAT GAA CGG GAC AGA AGG CCA<br>CCT ATG CAG GAG AGA CCT GGC TG    |

Primers used for amplification of full coding sequences for A) Rh2 and B) Rh1 opsin genes.

UOP: Universal outer primer. NUP: Nested universal primer.

\*\*These primers are the same. "for" stands for forward primer, "rev" stands for reverse primers.



**Table S3: Sequences used in the construction of the time-calibrated phylogeny of species used in this study.**

| SPECIES                          | SWS1     | RAG1       | Myoglobin  | ODC        | GAPDH      | Cytb       | ND2        |
|----------------------------------|----------|------------|------------|------------|------------|------------|------------|
| <i>Mniotilta varia</i>           | KM516261 | KC007795.1 |            |            |            | AF383006.1 |            |
| <i>Setophaga ruticilla</i>       | KM516263 | KC007796.1 | GU932298.1 | EU325831.1 |            | AF383008.1 | AF383124.1 |
| <i>Setophaga palmarum</i>        | KM516255 |            |            |            |            | EU815685.1 | JN568665.1 |
| <i>Setophaga fusca</i>           | KM516253 |            | GU932300.1 |            |            | AY340208.1 |            |
| <i>Setophaga castanea</i>        | KM516252 |            |            |            |            | EU815675.1 |            |
| <i>Setophaga striata</i>         | KM516258 |            | GU932313.1 |            |            | EU815688.1 | EU815772.1 |
| <i>Setophaga petechia</i>        | KM516257 |            | GU932308.1 |            |            | AF382996.1 | JQ218962.1 |
| <i>Setophaga pensylvanica</i>    | KM516256 |            | GU932307.1 |            |            | AY216828.1 |            |
| <i>Setophaga magnolia</i>        | KM516254 |            |            |            |            | EU815682.1 |            |
| <i>Setophaga caerulescens</i>    | KM516251 |            | GU932289.1 |            |            | EU815674.1 | JN568626.1 |
| <i>Oreothlypis ruficapilla</i>   | KM516264 |            | GU932348.1 |            |            | GU932421.1 |            |
| <i>Seiurus aurocapilla</i>       | KM516262 |            | GU932257.1 |            |            | AF383007.1 | AF383123.1 |
| <i>Geothlypis philadelphia</i>   | KM516260 |            |            |            |            | GU932399.1 |            |
| <i>Geothlypis trichas</i>        | KM516259 |            |            |            |            | AF383003.1 | AF383119.1 |
| <i>Cardellina pusilla</i>        | KM516265 |            |            |            |            | GU932416.1 |            |
| <i>Setophaga coronata</i>        |          | KC007793.1 | GU932292.1 |            |            | EU815677.1 | AY030146.1 |
| <i>Cardellina canadensis</i>     |          | KC007805.1 | GU932342.1 |            |            | AF383016.1 |            |
| <i>Phylloscopus pulcher</i>      | KM516270 |            | KJ454867.1 | KJ455871.1 | KJ455124.1 | KJ456396.1 | KJ455565.1 |
| <i>Phylloscopus maculipennis</i> | KM516267 |            | AY887701.1 | KJ455868.1 | KJ455121.1 | KJ456395.1 | KJ455562.1 |
| <i>Phylloscopus reguloides</i>   | KM516271 |            | AY887709.1 | KJ455872.1 | KJ455125.1 | KJ456397.1 | KJ455566.1 |
| <i>Phylloscopus chloronotus</i>  | KM516269 |            | DQ008556.1 | KJ455864.1 |            | KJ456391.1 | KJ455558.1 |
| <i>Phylloscopus humei</i>        | KM516266 |            | KJ454866.1 | KJ455867.1 | KJ455120.1 | KJ456394.1 | KJ455561.1 |
| <i>Phylloscopus occipitalis</i>  | KM516268 |            | AY887703.1 | KJ455870.1 | KJ455123.1 | AY635057.1 | KJ455564.1 |
| <i>Seicercus whistleri</i>       | KM516272 | KJ456144   | AY887726.1 | KJ455876   | KJ455174.1 | AY635065.1 | KJ455643.1 |

New World warblers

Old World warblers

|                                 |                            |                |                |            |                |            |            |
|---------------------------------|----------------------------|----------------|----------------|------------|----------------|------------|------------|
| <i>Regulus regulus</i>          | N. Bloch, unpublished data | JX236451.1     |                |            |                |            |            |
| <i>Chelidorhynch hypoxantha</i> | N. Bloch, unpublished data |                |                | GQ369664.1 |                | EF081357.1 | GQ145403.1 |
| <i>Zonotrichia albicollis</i>   | N. Bloch, unpublished data | XM_005480147.1 | XM_005488552.1 |            | XM_005486061.1 | EF529931.1 | FJ547327.1 |
| <i>Passerina cyanea</i>         | N. Bloch, unpublished data |                | EU191798.1     |            |                | AF089047.1 | AF447296.1 |
| <i>Serinus canaria</i>          | AJ277922.1                 |                | JN715301.1     | JN715393.1 | JN715213.1     | AY914116.1 | JN715484.1 |
| <i>Taeniopygia guttata</i>      | NM_001076704.1             | XM_002199682.1 | XM_002199380.2 |            | NM_001198610.1 | AY491525.1 | AY323596.2 |
| <i>Geospiza fortis</i>          | XM_005430818.1             | XM_005419485.1 | XM_005421806.1 |            | XM_005420667.1 | AF447369.1 | AF447282.1 |
| <i>Ficedula albicollis</i>      | XM_005061513.1             | XM_005046928.1 | XM_005039827.1 |            | XM_005038447.1 | DQ674491.1 | DQ674464.1 |
| <i>Pseudopodoces humilis</i>    | XM_005533413.1             | XM_005522398.1 | XM_005527553.1 | KF183744.1 | XM_005523849.1 | EU382201.1 | KF183833.1 |
| <i>Melopsittacus undulatus</i>  | Y11787.1                   | XM_005150647.1 | XM_005150402.1 |            | XM_005146692.1 | DQ143295.1 | EU327633.1 |
| <i>Gallus gallus</i>            | NM_205438.1                | NM_001031188.1 | NM_001167752.2 |            | NM_204305.1    | L08376.1   | KF792740.1 |

---

**Table S4: Time calibrations used for date estimates in the phylogeny construction**

| CALIBRATION TAXON                  | SISTER TAXA IN TREE            | CALIBRATION SOURCE                                                                                  | DATE RANGE (UPPER TO LOWER) | LOWER BOUND | CALIBRATION TYPE | ORIGINAL REFERENCES                                                                    |
|------------------------------------|--------------------------------|-----------------------------------------------------------------------------------------------------|-----------------------------|-------------|------------------|----------------------------------------------------------------------------------------|
| <i>Chlorospingus ophthalmicus</i>  | <i>Chlorospingus pileatus</i>  | Biogeographic (age of Talamanca uplift)                                                             | 4.5 to 0.0                  | NA          | Uniform          | (Gräfe <i>et al.</i> 2002; Weir & Schluter 2008)                                       |
| <i>Tangara dowii</i>               | <i>Tangara nigroviridis</i>    | Biogeographic (formation of isthmus of Panama)                                                      | 3.5 to 0.0                  | NA          | Uniform          | (Coates & Obando 1996; Burns & Naoki 2004; Weir & Schluter 2008)                       |
| <i>Sylvia melanothorax</i>         | <i>Sylvia rueppelli</i>        | Biogeographic (reformation of Cyprus)                                                               | 5.3 to 0.0                  | NA          | Uniform          | (Krijgsman <i>et al.</i> 1999; Böhning Gaese <i>et al.</i> 2006; Weir & Schluter 2008) |
| <i>Cyanocorax yncæ</i>             | Old World crows and jays       | Fossil <i>Miocitta galbreathi</i> (earliest New World jay)                                          | 80.0 to 16.3-13.6           | 14.95       | Uniform          | (Brodkorb 1972; Becker 1987)                                                           |
| <i>Oreothlypis celata</i>          | <i>Oreothlypis ruficapilla</i> | Fossil <i>Oreothlypis celata</i>                                                                    | 80.0 to 2.0                 | 2.0         | Uniform          | (Emslie 1998; Lovette & Hochachka 2006; Weir & Schluter 2008)                          |
| <i>Psittaculirostris edwardsii</i> | <i>Melopsittacus undulatus</i> | Fossil <i>Melopsittacus</i>                                                                         | 80.0 to 5.5                 | 5.5         | Uniform          | (Boles 1998)                                                                           |
| <i>Acanthisitta chloris</i>        | All Eupasserres                | Fossil <i>Wieslochia weissi</i> (Oldest Stem Eupasserres)                                           | 80.0 to 34.0-30.0           | 32.0        | Uniform          | (Mayr & Manegold 2004; 2006)                                                           |
| <i>Passeriformes</i>               | Psittaciformes                 | Fossil <i>Cyrilavis</i> (Halcyornithidae) member of Pan-Psittaciformes (oldest stem parrot lineage) | 135.0 to 51.81              | 51.81       | Uniform          | (Smith 2010; Ksepka <i>et al.</i> 2011; Ksepka & Clarke 2012)                          |
| <i>Coraciidae</i>                  | Alcedinidae                    | Fossil <i>Primobucco mcgrewi</i> (oldest stem Coraciidae)                                           | 135.0 to 51.81              | 51.81       | Uniform          | (Clarke <i>et al.</i> 2009; Ksepka & Clarke 2010)                                      |
| <i>Eudyptula minor</i>             | <i>Puffinus griseus</i>        | Fossil <i>Waimanu manningi</i> (oldest stem penguin)                                                | 135.0 to 61.0               | 61.0        | Uniform          | (Slack <i>et al.</i> 2006)                                                             |

All time-calibration taxa are a subset of those used in (Price *et al.* 2014).

**Table S5: Parameters used to choose the most appropriate models for Empirical Bayes ancestral reconstructions**

| GENE                                   | TREE               | MODEL                                  | lnL             | LRT                                |                                  |
|----------------------------------------|--------------------|----------------------------------------|-----------------|------------------------------------|----------------------------------|
| Rh2                                    | NEW WORLD WARBLERS | <b>CODON</b>                           |                 | <b>F61 + <math>\Gamma</math></b>   |                                  |
|                                        |                    | F1/61 + $\Gamma$                       | -1920.22        | 382.56**(60)                       |                                  |
|                                        |                    | F1X4 + $\Gamma$                        | -1891.15        | 324.45**(57)                       |                                  |
|                                        |                    | F3X4 + $\Gamma$                        | -1783.62        | 109.37**(51)                       |                                  |
|                                        |                    | <b>F61</b>                             | <b>-1728.94</b> | NA                                 |                                  |
|                                        |                    | <b>NUCLEOTIDE</b>                      |                 | <b>HKY85 + <math>\Gamma</math></b> | <b>GRT + <math>\Gamma</math></b> |
|                                        |                    | HKY85+G                                | -1889.43        | NA                                 | 53.44** (4)                      |
|                                        |                    | JC69+G                                 | -1946.54        | 114.20** (4)                       |                                  |
|                                        |                    | F81+G                                  | -1916.15        | 53.44 ** (1)                       |                                  |
|                                        |                    | K80+G                                  | -1921.22        | 63.58 ** (3)                       |                                  |
|                                        |                    | <b>GTR+G</b>                           | <b>-1916.15</b> | -                                  |                                  |
|                                        |                    | <b>AMINO ACID</b>                      |                 |                                    |                                  |
|                                        |                    | Poisson + F + $\Gamma$                 | -1150.21        |                                    |                                  |
|                                        |                    | <b>Jones + F + <math>\Gamma</math></b> | <b>-1095.48</b> |                                    |                                  |
|                                        |                    | Dayhoff78 + F + $\Gamma$               | -1100.69        |                                    |                                  |
|                                        |                    | MTMAM + F + $\Gamma$                   | -1097.83        |                                    |                                  |
|                                        |                    |                                        | PASSERINES      | <b>CODON</b>                       |                                  |
| F1/61 + $\Gamma$                       | -3591.51           |                                        |                 | 206.07**(60)                       |                                  |
| F1X4 + $\Gamma$                        | -3558.90           |                                        |                 | 140.85**(57)                       |                                  |
| <b>F3X4 + <math>\Gamma</math></b>      | <b>-3494.61</b>    |                                        |                 | 12.26 <sup>NS</sup> (51)           |                                  |
| F61                                    | -3488.48           |                                        |                 | NA                                 |                                  |
| <b>NUCLEOTIDE</b>                      |                    |                                        |                 | <b>HKY85 + <math>\Gamma</math></b> | <b>GRT + <math>\Gamma</math></b> |
| HKY85+G                                | -3629.34           |                                        |                 | NA                                 | 26.77**(4)                       |
| JC69+G                                 | -3765.51           |                                        |                 | 272.34**(4)                        |                                  |
| F81+G                                  | -3729.57           |                                        |                 | 200.47**(1)                        |                                  |
| K80+G                                  | -3670.89           |                                        |                 | 83.11**(3)                         |                                  |
| <b>GTR+G</b>                           | <b>-3615.95</b>    |                                        |                 | -                                  |                                  |
| <b>AMINO ACID</b>                      |                    |                                        |                 |                                    |                                  |
| Poisson + F + $\Gamma$                 | -1485.42           |                                        |                 |                                    |                                  |
| <b>Jones + F + <math>\Gamma</math></b> | <b>-1360.03</b>    |                                        |                 |                                    |                                  |
| Dayhoff78 + F + $\Gamma$               | <b>-1369.71</b>    |                                        |                 |                                    |                                  |
| MTMAM + F + $\Gamma$                   | -1364.34           |                                        |                 |                                    |                                  |
| Rh1                                    | PASSERINES         |                                        |                 | <b>CODON</b>                       |                                  |
|                                        |                    | F1/61 + $\Gamma$                       | -3144.81        | 323.04**(60)                       |                                  |
|                                        |                    | F1X4 + $\Gamma$                        | -3132.38        | 298.18**(57)                       |                                  |
|                                        |                    | <b>F3X4 + <math>\Gamma</math></b>      | <b>-3045.48</b> | 124.39**(51)                       |                                  |
|                                        |                    | F61                                    | <b>-2983.29</b> | NA                                 |                                  |

Summary of likelihood ratio test performed to chose best Codon, Nucleotide and Amino Acid models for ancestral reconstruction and positive selection tests (codon models). LRT = 2(lnL1- lnL2) and its significance is approximated to the  $\chi^2$  distribution with degrees of freedom indicated in parentheses. \*\* LRT p-values <0.05. Best fitting models are highlighted in bold. (for the explanation of the notation see (Yang 2007))

**Table S6: Parameter estimates for passerine Rh2 clade model D**

| RH2                                  |                | Purifying selection site class |            |       | Neutral site class |       | Divergent selection site class         |       |          | <i>lnL</i> | np        | <i>p-value</i><br>LRT vs<br>M3 (k=2)<br>(df) | <i>p-value</i><br>LRT vs<br>M3 (k=3)<br>(df) |
|--------------------------------------|----------------|--------------------------------|------------|-------|--------------------|-------|----------------------------------------|-------|----------|------------|-----------|----------------------------------------------|----------------------------------------------|
| Model:<br>Foreground clade           | Tree<br>length | $\kappa$                       | $\omega_0$ | $p_0$ | $\omega_1$         | $p_1$ | $\omega_2$<br>$\omega_3$<br>$\omega_4$ | $p_2$ |          |            |           |                                              |                                              |
| CmD: Setophaga warblers              | 1.73           | 6.02                           | 0.000      | 0.754 | 0.031              | 0.225 | 0.28<br>2.26                           | 0.021 | -2716.29 | 90         | 0.029 (3) | <b>0.009</b> (1)                             |                                              |
| CmD: New World warblers              | 1.73           | 6.01                           | 0.000      | 0.758 | 0.314              | 0.221 | <b>0.303</b><br><b>1.265</b>           | 0.021 | -2718.09 | 90         | 0.15 (3)  | 0.07 (1)                                     |                                              |
| CmD: Old World warblers              | 1.72           | 6.00                           | 0.000      | 0.804 | 0.529              | 0.014 | 0.051<br>0.000                         | 0.182 | -2716.83 | 90         | 0.048 (3) | <b>0.016</b> (1)                             |                                              |
| CmD: Bowerbirds*                     | 1.71           | 5.98                           | 0.003      | 0.906 | 0.080              | 0.080 | 0.443<br>0.753                         | 0.014 | -2719.63 | 90         | 0.51 (3)  | 0.64 (1)                                     |                                              |
| CmD: Setophaga* + Old World warblers | 1.74           | 6.01                           | 0.000      | 0.747 | 0.029              | 0.231 | 0.354<br>2.170<br>0.000                | 0.022 | -2714.24 | 91         | 0.011(4)  | <b>0.004</b> (2)                             |                                              |
| M3 (k=3)                             | 1.72           | 6.00                           | 0.000      | 0.782 | 0.037              | 0.199 | 0.441                                  | 0.019 | -2719.74 | 89         | 0.35 (2)  | -                                            |                                              |
| M3 (k=2)                             | 1.70           | 5.98                           | 0.004      | 0.951 | 0.213              | 0.049 |                                        |       | -2720.79 | 87         | -         | -                                            |                                              |

CmD: Clade model D with  $k = 3$ , a model that allows for different  $\omega$  between a clade set as foreground and the rest of the tree. The framework is similar to Clade model C (CmC), but CmD places no constraint on the estimates of  $\omega$  for any of the site classes. In each case the clade associated with each test was set as foreground clade.  $\omega_3$ ,  $\omega_4$  are the ratios for the “foreground” clades. \*Based on “limited sequence dataset”. Tree length is defined as the sum of the branch lengths along the tree in substitutions per codon.

$\kappa$  (kappa) transition/transversion rate

$p_i$  refers to the proportion of sites inferred to be in each selection category.

**Table S7: Parameter estimates for passerines Rh1 clade models (CmC)**

| RH1 | Model: Foreground clade | Tree length | $\kappa$ | PURIFYING SELECTION SITE CLASS |       | NEUTRAL SITE CLASS |       | DIVERGENT SELECTION SITE CLASS |       | <i>lnL</i> | np | <i>p-value</i><br>LRT vs<br>M2a_rel<br>(df) |
|-----|-------------------------|-------------|----------|--------------------------------|-------|--------------------|-------|--------------------------------|-------|------------|----|---------------------------------------------|
|     |                         |             |          | $\omega_0$                     | $p_0$ | $\omega_1$         | $p_1$ | $\omega_2$<br>$\omega_3$       | $p_2$ |            |    |                                             |
|     | CmC: Setophaga warblers | 1.52        | 3.56     | 0.000                          | 0.605 | 1.0                | 0.003 | <b>0.032</b><br><b>0.000</b>   | 0.391 | -3437.96   | 78 | <b>0.009</b> (1)                            |
|     | CmC: New World warblers | 1.54        | 3.62     | 0.011                          | 0.997 | 1.0                | 0.00  | 0.031<br><b>0.000</b>          | 0.387 | -3438.38   | 78 | <b>0.014</b> (1)                            |
|     | CmC: Old World warblers | 1.52        | 3.57     | 0.055                          | 0.000 | 1.0                | 0.003 | <b>0.115</b><br><b>0.000</b>   | 0.997 | -3440.29   | 78 | 0.14                                        |
|     | CmC: Bowerbirds         | 1.52        | 3.58     | 0.004                          | 0.807 | 1.0                | 0.003 | <b>0.031</b><br><b>0.151</b>   | 0.190 | -3440.06   | 78 | 0.1                                         |
|     | M2a_rel                 | 1.52        | 3.57     | 0.000                          | 0.600 | 1.0                | 0.003 | 0.263                          | 0.396 | -3441.4    | 77 | -                                           |

CmC: Clade model C, a model that allows for different  $\omega$  between a clade set as foreground and the rest of the tree. In each case the clade associated with each test was set as foreground clade.  $\omega_3$  is the ratio for the “foreground” clade. M2a\_rel is the improved test for use as a null model in the LRT by (Weadick & Chang 2012a).

Tree length is defined as the sum of the branch lengths along the tree in substitutions per codon.

$\kappa$  (kappa) transition/transversion rate

$p_i$  refers to the proportion of sites inferred to be in each selection category.

**Table S8: Synonymous and non-synonymous rates of evolution estimated for Rh2 and Rh1**

| <b>Rh2</b>                            |            |                      |                      |          |          |      |          |
|---------------------------------------|------------|----------------------|----------------------|----------|----------|------|----------|
| Tree/species considered               | model      | dN<br>Tree<br>length | dS<br>Tree<br>length | $\kappa$ | $l$      | $np$ | $\omega$ |
| Main dataset                          | Free ratio | 0.062                | 3.668                | 4.711    | -3420.87 | 131  | Variable |
| Limited sequence including bowerbirds | Free ratio | 0.057                | 4.985                | 5.517    | -2713.76 | 167  | Variable |
| <b>Rh1</b>                            |            |                      |                      |          |          |      |          |
| Tree/species considered               | model      | dN<br>Tree<br>length | dS<br>Tree<br>length | $\kappa$ | $l$      | $np$ | $\omega$ |
| Main dataset                          | Free ratio | 0.039                | 2.390                | 3.584    | -3454.60 | 143  | Variable |

Estimates obtained from a free-ratio model in PAML. Graphical summaries of each branch dN rates can be found in Fig. 4 & S4.

### 3. Supplementary references

- Becker JJ (1987) *Neogene avian localities of North America*. Smithsonian Institution Press, Washington, DC.
- Boles WE (1998) A budgerigar *Melopsittacus undulatus* from the Pliocene of Riversleigh, North-western Queensland. *Emu*, **98**, 32–35.
- Böhning Gaese K, Caprano T, van Ewijk K, Veith M (2006) Range size: disentangling current traits and phylogenetic and biogeographic factors. *The American Naturalist*, **167**, 555–567.
- Brodkorb P (1972) Neogene Fossil Jays from the Great Plains. *The Condor*, **74**, 347–349.
- Burns KJ, Naoki K (2004) Molecular phylogenetics and biogeography of Neotropical tanagers in the genus *Tangara*. *Molecular Phylogenetics and Evolution*, **32**, 838–854.
- Clarke JA, Ksepka DT, Smith NA, Norell MA (2009) Combined phylogenetic analysis of a new North American fossil species confirms widespread Eocene distribution for stem rollers (Aves, Coracii). *Zoological Journal of the Linnean Society*, **157**, 586–611.
- Coates AG, Obando JA (1996) The geological evolution of the Central American Isthmus. In: *Evolution and Environment in Tropical America* (eds JBC J, AF B, Coates AG), pp. 21–56.
- Coyle BJ, Hart NS, Carleton KL, Borgia G (2012) Limited variation in visual sensitivity among bowerbird species suggests that there is no link between spectral tuning and variation in display colouration. *Journal of Experimental Biology*, **215**, 1090–1105.
- Das D, Wilkie S, Hunt D, Bowmaker JK (1999) Visual pigments and oil droplets in the retina of a passerine bird, the canary *Serinus canaria*: microspectrophotometry and opsin sequences. *Vision Research*, **39**, 2801–2815.
- Emslie SD (1998) *Avian community, climate, and sea-level changes in the Pliocene of the Florida peninsula*. American Ornithologists' Union, Washington, DC.
- Gräfe K, Frisch W, Villa IM, Meschede M (2002) Geodynamic evolution of southern Costa Rica related to low-angle subduction of the Cocos Ridge: constraints from thermochronology. *Tectonophysics*, **348**, 187–204.
- Heath LA, Wilkie SE, Bowmaker JK, Hunt DM (1997) The rod and green cone opsins of two avian species, the budgerigar, *Melopsittacus undulatus*, and the mallard duck, *Anas platyrhynchos*. *Gene*, **204**, 121–126.



- Krijgsman W, Hilgen FJ, Raffi I, Sierro FJ, Wilson DS (1999) Chronology, causes and progression of the Messinian salinity crisis. *Nature*, **400**, 652–655.
- Ksepka DT, Clarke JA (2010) *Primobucco mcgrewi* (Aves: Coracii) from the Eocene Green River Formation: new anatomical data from the earliest constrained record of stem rollers. *Journal of Vertebrate Paleontology*, **30**, 215–225.
- Ksepka DT, Clarke JA (2012) A new stem parrot from the Green River Formation and the complex evolution of the grasping foot in Pan-Psittaciformes. *Journal of Vertebrate Paleontology*, **32**, 395–406.
- Ksepka DT, Clarke JA, Grande L (2011) Stem parrots (Aves, Halcyornithidae) from the Green River Formation and a combined phylogeny of Pan-Psittaciformes. *Journal of Paleontology*, **85**, 835–852.
- Lovette I, Hochachka W (2006) Simultaneous effects of phylogenetic niche conservatism and competition on avian community structure. *Ecology*, **87**, S14–S28.
- Mayr G, Manegold A (2004) The oldest European fossil songbird from the early Oligocene of Germany. *Naturwissenschaften*, **91**, 173–177.
- Mayr G, Manegold A (2006) New specimens of the earliest European passeriform bird. *Acta Palaeontologica Polonica*, **51**, 315–323.
- Okano T, Kojima D, Fukada Y, Shichida Y, Yoshizawa T (1992) Primary structures of chicken cone visual pigments: vertebrate rhodopsins have evolved out of cone visual pigments. *Proceedings of the National Academy of Sciences USA*, **89**, 5932–5936.
- Palczewski K, Kumasaka T, Hori T, Behnke CA (2000) Crystal structure of rhodopsin: a G protein-coupled receptor. *Science*, **289**, 739–745.
- Price TD, Hooper DM, Buchanan CD *et al.* (2014) Niche filling slows the diversification of Himalayan songbirds. *Nature*, **509**, 222–225.
- Slack KE, Jones CM, Ando T *et al.* (2006) Early penguin fossils, plus mitochondrial genomes, calibrate avian evolution. *Molecular Biology and Evolution*, **23**, 1144–1155.
- Smith ND (2010) Phylogenetic Analysis of Pelecaniformes (Aves) Based on Osteological Data: Implications for Waterbird Phylogeny and Fossil Calibration Studies (R DeSalle, Ed.). *PLoS ONE*, **5**, e13354.
- Weir JT, Schluter D (2008) Calibrating the avian molecular clock. *Molecular Ecology*, **17**, 2321–2328.
- Yang Z (2007) PAML 4: Phylogenetic analysis by maximum likelihood. *Molecular Biology and Evolution*, **24**, 1586–1591.

Yokoyama S, Blow NS, Radlwimmer FB (2000) Molecular evolution of color vision of zebra finch. *Gene*, **259**, 17–24.
